# Supplementary material for: The Effect of Long Working Hours and Overtime on Occupational Health: A Meta-Analysis of Evidence from 1998 to 2018
Source: PubMed Central journal article supplement (PMC6617405; doi:10.3390/ijerph16122102), 2019-06-13
Supplement: ijerph-16-02102-s001.pdf [file ijerph-16-02102-s001.pdf]

**Table S1.** The information and odds ratios of the 46 papers (sorted in year of publication).

| First author (published year)     | Country of origin | Number of participants   | Gender          | Study design                         | Diagnosis method | Working class | Health measure               | Reference working hours | Working hours | Occupational health condition | OR    | 95% CI      |
|-----------------------------------|-------------------|--------------------------|-----------------|--------------------------------------|------------------|---------------|------------------------------|-------------------------|---------------|-------------------------------|-------|-------------|
| Sokejima (1998) <sup>a</sup> [1]  | Japan             | 526                      | Male            | Case-control study                   | HME              | Yes           | Acute myocardial infarction  | ≤7-9h/d                 | 9-11h/d       | PH                            | 0.960 | 0.578-1.594 |
|                                   |                   |                          |                 |                                      |                  |               |                              |                         | >11h/d        | PH                            | 2.940 | 0.139-6.234 |
| Nakanishi (2001) <sup>a</sup> [2] | Japan             | 1266                     | Male            | Prospective cohort study (5 years)   | HME              | Yes           | Type 2 diabetes              | <8h/d                   | 8-8.9h/d      | PH                            | 0.947 | 0.496-1.808 |
|                                   |                   |                          |                 |                                      |                  |               |                              |                         | 9-9.9h/d      | PH                            | 0.447 | 0.177-1.132 |
|                                   |                   |                          |                 |                                      |                  |               |                              |                         | 10-10.9h/d    | PH                            | 0.469 | 0.173-1.272 |
|                                   |                   |                          |                 |                                      |                  |               |                              |                         | ≥11h/d        | PH                            | 0.375 | 0.126-1.116 |
| Nakanishi (2001) <sup>a</sup> [3] | Japan             | 941                      | Male            | Prospective cohort study (5 years)   | HME              | Yes           | Hypertension                 | <8h/d                   | 8-8.9h/d      | PH                            | 0.769 | 0.435-1.361 |
|                                   |                   |                          |                 |                                      |                  |               |                              |                         | 9-9.9h/d      | PH                            | 1.001 | 0.550-1.823 |
|                                   |                   |                          |                 |                                      |                  |               |                              |                         | 10-10.9h/d    | PH                            | 0.534 | 0.254-1.123 |
|                                   |                   |                          |                 |                                      |                  |               |                              |                         | ≥11h/d        | PH                            | 0.223 | 0.077-0.647 |
| Liu (2002) <sup>a</sup> [4]       | Japan             | 705                      | Male            | Case-control study                   | HME              | Yes           | Acute myocardial infarction  | ≤40 h/w                 | 41-60h/w      | PH                            | -     | -           |
|                                   |                   |                          |                 |                                      |                  |               |                              |                         | >61h/w        | PH                            | 1.800 | 0.991-3.270 |
| Akerstedt (2002) <sup>a</sup> [5] | Sweden            | 58115 (M:30524; F:27591) | Male and female | Prospective cohort study (20 years)  | SR               | Yes           | Disturbed sleep Fatigue      | ≤50 h/w                 | >50 h/w       | RH                            | 1.050 | 0.911-1.211 |
|                                   |                   |                          |                 |                                      |                  |               |                              |                         | >50 h/w       | RH                            | 1.350 | 1.231-1.481 |
| Tarumi (2003) [6]                 | Japan             | 867 (M:778; F:89)        | Male and female | Prospective cohort study (3.6 years) | SR               | Yes           | Mental disorders             | ≤44h/w                  | 45-49.9h/w    | MH                            | 1.333 | 0.442-4.013 |
|                                   |                   |                          |                 |                                      |                  |               |                              |                         | ≥50h/w        | MH                            | 1.321 | 0.439-3.980 |
|                                   |                   |                          |                 |                                      |                  |               | Circulatory disorders        |                         | 45-49.9h/w    | PH                            | 1.553 | 0.744-3.240 |
|                                   |                   |                          |                 |                                      |                  |               |                              |                         | ≥50h/w        | PH                            | 1.220 | 0.560-2.655 |
| Fukuoka (2005) <sup>a</sup> [7]   | Japan             | 94 (M:92; F:2)           | Male and female | Cross-sectional study                | HME              | Yes           | Acute myocardial infarction  | <55h/w                  | ≥55h/w        | PH                            | 0.870 | 0.236-3.206 |
| Uchiyama (2005) <sup>a</sup> [8]  | Japan             | 1615 (M:908; F:707)      | Male            | Prospective cohort study (5.6 years) | HME              | Yes           | Cardiovascular heart disease | ≤9h/d                   | ≥10h/d        | PH                            | 1.204 | 0.561-2.582 |
|                                   |                   |                          |                 |                                      |                  |               |                              |                         | ≥10h/d        | PH                            | 0.388 | 0.022-6.727 |
| Grosch (2006) <sup>a</sup> [9]    | The US            |                          |                 |                                      | SR               | Yes           | Job stress                   | ≤40h/w                  | 41-48h/w      | MH                            | 1.160 | 0.840-1.601 |
|                                   |                   |                          |                 |                                      |                  |               |                              |                         | 49-69h/w      | MH                            | 1.790 | 1.351-2.372 |

|                                       |        |                                |                       |                              |    |     |                         |          |                   |    |       |              |
|---------------------------------------|--------|--------------------------------|-----------------------|------------------------------|----|-----|-------------------------|----------|-------------------|----|-------|--------------|
|                                       |        | 1744<br>(M:849;<br>F:895)      | Male<br>and<br>female | Cross-<br>sectional<br>study |    |     |                         |          | ≥70h/w            | MH | 2.490 | 1.561-3.972  |
|                                       |        |                                |                       |                              |    |     | Hurt                    |          | 41-48h/w          | RH | 0.860 | 0.515-1.436  |
|                                       |        |                                |                       |                              |    |     |                         |          | 49-69h/w          | RH | 1.240 | 0.810-1.899  |
|                                       |        |                                |                       |                              |    |     | General Health          |          | ≥70h/w            | RH | 1.870 | 0.993-3.521  |
|                                       |        |                                |                       |                              |    |     |                         |          | 41-48h/w          | NH | 0.900 | 0.570-1.421  |
|                                       |        |                                |                       |                              |    |     |                         |          | 49-69h/w          | NH | 0.540 | 0.338-0.864  |
|                                       |        |                                |                       |                              |    |     | Poor mental<br>health   |          | ≥70h/w            | NH | 1.940 | 1.071-3.514  |
|                                       |        |                                |                       |                              |    |     |                         |          | 41-48h/w          | MH | 1.050 | 0.671-1.643  |
|                                       |        |                                |                       |                              |    |     |                         |          | 49-69h/w          | MH | 1.020 | 0.676-1.540  |
|                                       |        |                                |                       |                              |    |     | Poor physical<br>health |          | ≥70h/w            | MH | 1.590 | 0.851-2.972  |
|                                       |        |                                |                       |                              |    |     |                         |          | 41-48h/w          | PH | 0.820 | 0.429-1.567  |
|                                       |        |                                |                       |                              |    |     |                         |          | 49-69h/w          | PH | 0.740 | 0.398-1.374  |
|                                       |        |                                |                       |                              |    |     |                         |          | ≥70h/w            | PH | 5.020 | 2.488-10.130 |
| Sekine<br>(2006) <sup>a</sup> [10]    | Japan  | 3556<br>(M:2397;<br>F:1159)    | Male<br><br>Female    | Cross-<br>sectional<br>study | SR | Yes | Poor sleep<br>quality   | 7-9h/d   | 9-11h/d           | RH | 1.110 | 0.839-1.468  |
|                                       |        |                                |                       |                              |    |     |                         |          | <11h/d            | RH | 1.490 | 1.031-2.153  |
|                                       |        |                                |                       |                              |    |     |                         |          | 9-11h/d           | RH | 1.320 | 0.948-1.837  |
|                                       |        |                                |                       |                              |    |     |                         |          | <11h/d            | RH | 2.020 | 1.236-3.300  |
| Yang<br>(2006) <sup>a</sup> [11]      | The US | 24205<br>(M:13724;<br>F:10481) | Male<br>and<br>female | Cross-<br>sectional<br>study | SR | Yes | Hypertension            | 11-39h/w | 41-50h/w          | PH | 1.170 | 1.035-1.323  |
|                                       |        |                                |                       |                              |    |     |                         |          | ≥51h/w            | PH | 1.290 | 1.097-1.516  |
| Nagashima<br>(2007) <sup>a</sup> [12] | Japan  | 715                            | Male                  | Cross-<br>sectional<br>study | SR | No  | Fatigue                 | <50h/w   | 50-<br><50h/w     | RH | 0.900 | 0.570-1.421  |
|                                       |        |                                |                       |                              |    |     |                         |          | <55h/w-<br><60h/w | RH | 0.810 | 0.450-1.459  |
|                                       |        |                                |                       |                              |    |     |                         |          | 60-<br><65h/w     | RH | 1.070 | 0.586-1.955  |
|                                       |        |                                |                       |                              |    |     |                         |          | 65-<br><70h/w     | RH | 1.890 | 0.983-3.632  |
|                                       |        |                                |                       |                              |    |     | Physical<br>disorder    |          | ≥70h/w            | RH | 2.320 | 1.208-4.454  |
|                                       |        |                                |                       |                              |    |     |                         |          | 50-<br><50h/w     | PH | 1.410 | 0.821-2.422  |
|                                       |        |                                |                       |                              |    |     |                         |          | <55h/w-<br><60h/w | PH | 1.090 | 0.541-2.195  |
|                                       |        |                                |                       |                              |    |     |                         |          | 60-<br><65h/w     | PH | 0.770 | 0.321-1.846  |
|                                       |        |                                |                       |                              |    |     |                         |          | 65-<br><70h/w     | PH | 1.850 | 0.832-4.112  |
|                                       |        |                                |                       |                              |    |     |                         |          | ≥70h/w            | PH | 2.430 | 1.103-5.354  |



|  |       |      |        |  |  |  |                       |  |  |    |       |             |
|--|-------|------|--------|--|--|--|-----------------------|--|--|----|-------|-------------|
|  |       |      | Female |  |  |  | Unhealthy food habits |  |  | HB | 1.030 | 0.774-1.370 |
|  |       |      |        |  |  |  | Physical inactivity   |  |  | HB | 1.050 | 0.836-1.319 |
|  |       |      |        |  |  |  | Heavy drink           |  |  | HB | 0.980 | 0.706-1.361 |
|  |       |      |        |  |  |  | Smoking               |  |  | HB | 1.030 | 0.834-1.271 |
|  |       |      | Male   |  |  |  | Obesity               |  |  | PH | 1.080 | 0.854-1.366 |
|  | Japan | 2213 |        |  |  |  | Physical inactivity   |  |  | HB | 0.980 | 0.681-1.411 |
|  |       |      |        |  |  |  | Heavy drink           |  |  | HB | 0.830 | 0.584-1.179 |
|  |       |      |        |  |  |  | Smoking               |  |  | HB | 0.670 | 0.494-0.908 |
|  |       |      |        |  |  |  | Obesity               |  |  | PH | 0.860 | 0.611-1.211 |
|  |       |      | Female |  |  |  | Physical inactivity   |  |  | HB | 0.950 | 0.490-1.841 |
|  |       |      |        |  |  |  | Heavy drink           |  |  | HB | 0.770 | 0.227-2.609 |
|  |       |      |        |  |  |  | Smoking               |  |  | HB | 1.470 | 0.341-6.343 |
|  |       |      |        |  |  |  | Obesity               |  |  | PH | 0.640 | 0.350-1.170 |

|                                   |       |                        |        |                       |    |     |                                   |          |          |    |       |             |
|-----------------------------------|-------|------------------------|--------|-----------------------|----|-----|-----------------------------------|----------|----------|----|-------|-------------|
| Artazcoz (2009) <sup>a</sup> [14] | Spain | 7085 (M: 3950; F:3135) | Male   | Cross-sectional study | SR | Yes | Poor self-perceived health status | 30-40h/w | 41-50h/w | NH | 0.960 | 0.747-1.234 |
|                                   |       |                        |        |                       |    |     |                                   |          | 51-60h/w | NH | 1.430 | 0.977-2.093 |
|                                   |       |                        |        |                       |    |     | Poor mental health status         |          | 41-50h/w | MH | 1.240 | 0.905-1.700 |
|                                   |       |                        |        |                       |    |     |                                   |          | 51-60h/w | MH | 2.060 | 1.310-3.240 |
|                                   |       |                        |        |                       |    |     | Hypertension                      |          | 41-50h/w | PH | 1.190 | 0.947-1.495 |
|                                   |       |                        |        |                       |    |     |                                   |          | 51-60h/w | PH | 1.600 | 1.119-2.288 |
|                                   |       |                        |        |                       |    |     | Smoking                           |          | 41-50h/w | HB | 1.110 | 0.953-1.293 |
|                                   |       |                        |        |                       |    |     |                                   |          | 51-60h/w | HB | 1.330 | 1.029-1.719 |
|                                   |       |                        |        |                       |    |     | Physical inactivity               |          | 41-50h/w | HB | 1.730 | 1.314-2.277 |
|                                   |       |                        |        |                       |    |     |                                   |          | 51-60h/w | HB | 2.430 | 1.640-3.600 |
|                                   |       |                        |        |                       |    |     | Insufficient sleep                |          | 41-50h/w | RH | 1.300 | 1.111-1.521 |
|                                   |       |                        |        |                       |    |     |                                   |          | 51-60h/w | RH | 1.420 | 1.090-1.850 |
|                                   |       |                        | Female |                       |    |     | Poor self-perceived health status |          | 41-50h/w | NH | 1.020 | 0.749-1.389 |
|                                   |       |                        |        |                       |    |     |                                   |          | 51-60h/w | NH | 1.380 | 0.743-2.562 |
|                                   |       |                        |        |                       |    |     | Poor mental health status         |          | 41-50h/w | MH | 0.990 | 0.728-1.346 |
|                                   |       |                        |        |                       |    |     |                                   |          | 51-60h/w | MH | 1.430 | 0.771-2.653 |
|                                   |       |                        |        |                       |    |     | Hypertension                      |          | 41-50h/w | PH | 0.660 | 0.426-1.021 |
|                                   |       |                        |        |                       |    |     |                                   |          | 51-60h/w | PH | 1.060 | 0.458-2.451 |

|                          |                     |                       |                 |                                      |     |     |                            |          |            |    |       |             |
|--------------------------|---------------------|-----------------------|-----------------|--------------------------------------|-----|-----|----------------------------|----------|------------|----|-------|-------------|
|                          |                     |                       |                 |                                      |     |     | Smoking                    |          | 41-50h/w   | HB | 0.840 | 0.663-1.065 |
|                          |                     |                       |                 |                                      |     |     |                            |          | 51-60h/w   | HB | 2.270 | 1.391-3.704 |
|                          |                     |                       |                 |                                      |     |     | Physical inactivity        |          | 41-50h/w   | HB | 1.380 | 0.961-1.982 |
|                          |                     |                       |                 |                                      |     |     |                            |          | 51-60h/w   | HB | 1.530 | 0.690-3.391 |
|                          |                     |                       |                 |                                      |     |     | Insufficient sleep         |          | 41-50h/w   | RH | 1.000 | 0.781-1.281 |
|                          |                     |                       |                 |                                      |     |     |                            |          | 51-60h/w   | RH | 2.210 | 1.343-3.637 |
| Pimenta (2009)* [15]     | Spain               | 8779 (M:3528; F:5251) | Male            | Prospective cohort study (4.2 years) | SR  | Yes | Hypertension               | ≤39h/w   | 40-49h/w   | PH | 1.030 | 0.746-1.422 |
|                          |                     |                       | Female          |                                      |     |     |                            |          | 50-60h/w   | PH | 1.030 | 0.754-1.407 |
|                          |                     |                       |                 |                                      |     |     |                            |          | ≥60h/w     | PH | 0.980 | 0.633-1.517 |
|                          |                     |                       |                 |                                      |     |     |                            |          | 40-50h/w   | PH | 1.220 | 0.760-1.959 |
|                          |                     |                       |                 |                                      |     |     |                            |          | ≥50h/w     | PH | 1.080 | 0.590-1.978 |
| Virtanen (2009) [16]     | London, the UK      | 2470 (M:1872; F:598)  | Male and female | Prospective cohort study (3 years)   | SR  | Yes | Insufficient sleep (<7h/d) | 35-40h/w | 41-55h/w   | RH | 1.550 | 1.031-2.331 |
|                          |                     |                       |                 |                                      |     |     |                            |          | >55h/w     | RH | 2.800 | 1.200-6.532 |
| Driesen (2010)* [17]     | Italy               | 7217                  | Male            | Cross-sectional study                | SR  | No  | Depressive symptoms        | <45h/w   | 45-50h/w   | MH | 1.250 | 0.845-1.850 |
|                          |                     |                       | Female          |                                      |     |     |                            |          | 51-60h/w   | MH | 1.420 | 0.779-2.588 |
|                          |                     |                       |                 |                                      |     |     |                            |          | >60/w      | MH | 2.360 | 0.752-7.408 |
|                          |                     |                       |                 |                                      |     |     |                            |          | >45h/w     | MH | 1.180 | 0.440-3.162 |
| Holtermann (2010)* [18]  | Copenhagen, Denmark | 4964                  | Male            | Prospective cohort study (30 years)  | HME | No  | Ischaemic heart disease    | ≤40h/w   | 45-49.5h/w | PH | 1.610 | 1.197-2.164 |
|                          |                     |                       |                 |                                      |     |     |                            |          | ≥50h/w     | PH | 1.257 | 0.886-1.783 |
|                          |                     |                       |                 |                                      |     |     | All-cause mortality        | ≤40h/w   | 45-49.5h/w | PH | 1.055 | 0.890-1.250 |
|                          |                     |                       |                 |                                      |     |     |                            |          | ≥50h/w     | PH | 0.789 | 0.644-0.966 |
| Nash (2010)* [19]        | Australia           | 2953 (M:2085; F:868)  | Male and female | Cross-sectional study                | SR  | Yes | Psychiatric morbidity      | <40h/w   | 40-49h/w   | MH | 1.230 | 0.932-1.623 |
|                          |                     |                       |                 |                                      |     |     |                            |          | 50-59h/w   | MH | 1.410 | 1.051-1.892 |
|                          |                     |                       |                 |                                      |     |     |                            |          | ≥60h/w     | MH | 1.650 | 1.202-2.264 |
|                          |                     |                       |                 |                                      |     |     | Hazardous alcohol use      | <40h/w   | 40-49h/w   | HB | 1.130 | 0.809-1.578 |
|                          |                     |                       |                 |                                      |     |     |                            |          | 50-59h/w   | HB | 1.150 | 0.818-1.616 |
|                          |                     |                       |                 |                                      |     |     |                            |          | ≥60h/w     | HB | 0.670 | 0.452-0.994 |
| Netterstrøm (2010)* [20] | Copenhagen, Denmark | 1146 (M:551; F:595)   | Male            | Prospective cohort study (14 years)  | HME | Yes | Ischaemic heart disease    | <50h/w   | >50h/w     | PH | 0.700 | 0.191-2.572 |
|                          |                     |                       | Female          |                                      |     |     |                            |          | <50h/w     | PH | 0.800 | 0.091-7.065 |
| Virtanen (2010) [21]     | The UK              | 6014 (M:4262; F:1752) | Male and female | Prospective cohort study (11 years)  | SR  | Yes | Coronary heart disease     | 7-8 h/d  | 9h/d       | PH | 0.951 | 0.716-1.262 |
|                          |                     |                       |                 |                                      |     |     |                            |          | 10h/d      | PH | 1.167 | 0.865-1.576 |
|                          |                     |                       |                 |                                      |     |     |                            |          | 11-12h/d   | PH | 1.462 | 1.060-2.018 |

|                                    |                           |                           |                 |                                       |     |     |                        |                      |                     |             |             |             |
|------------------------------------|---------------------------|---------------------------|-----------------|---------------------------------------|-----|-----|------------------------|----------------------|---------------------|-------------|-------------|-------------|
| Kivimäki (2011) [22]               | London, the UK            | 7095 (M:4986; F:2109)     | Male and female | Prospective cohort study (12.3 years) | HME | No  | Coronary heart disease | <11h/d               | ≥11h/d              | PH          | 1.670       | 1.097-2.543 |
| Nakashima (2011) <sup>a</sup> [23] | Japan                     | 1510                      | Male            | Cross-sectional study                 | SR  | Yes | Poor sleep quality     | <46.5h/w             | ≥46.5-<br><50h/w    | RH          | 0.900       | 0.600-1.350 |
|                                    |                           |                           |                 |                                       |     |     |                        |                      | ≥50-<br><52.5h/w    | RH          | 1.220       | 0.826-1.802 |
|                                    |                           |                           |                 |                                       |     |     |                        |                      | ≥52.5-<br><57.75h/w | RH          | 1.380       | 0.937-2.033 |
|                                    |                           |                           |                 |                                       |     |     |                        |                      | ≥57.75h/w           | RH          | 1.380       | 0.929-2.049 |
|                                    |                           |                           |                 |                                       |     |     |                        | Short sleep duration | ≥46.5-<br><50h/w    | RH          | 1.430       | 1.024-1.997 |
|                                    |                           |                           |                 |                                       |     |     |                        |                      | ≥50-<br><52.5h/w    | RH          | 1.510       | 1.080-2.111 |
|                                    |                           |                           |                 |                                       |     |     |                        |                      | ≥52.5-<br><57.75h/w | RH          | 1.750       | 1.250-2.450 |
|                                    | ≥57.75h/w                 | RH                        | 3.680           | 2.587-5.234                           |     |     |                        |                      |                     |             |             |             |
| Virtanen (2011) <sup>a</sup> [24]  | The UK                    | 2960 (M:2248; F:712)      | Male            | Prospective cohort study (5 years)    | SR  | Yes | Depression             | ≤40h/w               | 41-55h/w            | MH          | 0.844       | 0.618-1.152 |
|                                    |                           |                           |                 |                                       |     |     |                        |                      | >55h/w              | MH          | 1.035       | 0.624-1.719 |
|                                    |                           |                           |                 |                                       |     |     |                        |                      | 41-55h/w            | MH          | 0.947       | 0.704-1.275 |
|                                    |                           |                           |                 |                                       |     |     | >55h/w                 | MH                   | 1.228               | 0.769-1.962 |             |             |
|                                    |                           |                           | Female          |                                       |     |     | Depression             | 41-55h/w             | MH                  | 1.855       | 1.117-3.082 |             |
|                                    |                           |                           |                 |                                       |     |     |                        | >55h/w               | MH                  | 1.874       | 0.770-4.559 |             |
|                                    |                           |                           |                 |                                       |     |     |                        | 41-55h/w             | MH                  | 1.316       | 0.819-2.113 |             |
| >55h/w                             | MH                        | 2.093                     |                 | 0.967-4.533                           |     |     |                        |                      |                     |             |             |             |
| Kobayashi (2012) <sup>a</sup> [25] | Japan                     | 911                       | Male            | Cross-sectional study                 | HME | Yes | Metabolic syndrome     | ≤7 to 8 h/d          | >8-9h/d             | PH          | 1.660       | 0.913-3.019 |
|                                    |                           |                           |                 |                                       |     |     |                        |                      | >9-10h/d            | PH          | 1.480       | 0.753-2.910 |
|                                    |                           |                           |                 |                                       |     |     |                        |                      | >10h/d              | PH          | 2.320       | 1.042-5.168 |
| Schluter (2012) <sup>a</sup> [26]  | Australia and New Zealand | 4419 (M:3552; F:867)      | Male and female | Cross-sectional study                 | SR  | Yes | Alcohol use            | <40h/w               | 40-49h/w            | HB          | 1.260       | 1.006-1.579 |
|                                    |                           |                           |                 |                                       |     |     |                        |                      | ≥50h/w              | HB          | 1.460       | 1.020-2.090 |
| Virtanen (2012) <sup>a</sup> [27]  | London, the UK            | 2123 (M:1626; F:497)      | Male and female | Prospective Cohort Study (5 years)    | SR  | Yes | Depressive symptoms    | 7-8h/d               | 9h/d                | MH          | 0.620       | 0.279-1.376 |
|                                    |                           |                           |                 |                                       |     |     |                        |                      | 10h/d               | MH          | 1.180       | 0.557-2.498 |
|                                    |                           |                           |                 |                                       |     |     |                        |                      | 11-12/d             | MH          | 2.300       | 1.048-5.049 |
| Wirtz (2012) <sup>a</sup> [28]     | The US                    | 96915 (M: 48816; F:48099) | Male and Female | Cross-sectional study                 | HME | Yes | Injury                 | 31-40h/w             | 41/50h/w            | RH          | 1.210       | 0.923-1.586 |
|                                    |                           |                           |                 |                                       |     |     |                        |                      | >50h/w              | RH          | 1.120       | 0.799-1.569 |
|                                    |                           |                           |                 |                                       |     |     |                        |                      | 41/50h/w            | RH          | 1.510       | 1.031-2.212 |

|                                    |                       |                                   |                 |                                      |     |     |                              |          |            |    |       |              |
|------------------------------------|-----------------------|-----------------------------------|-----------------|--------------------------------------|-----|-----|------------------------------|----------|------------|----|-------|--------------|
|                                    |                       |                                   |                 |                                      |     |     |                              |          | >50h/w     | RH | 1.690 | 1.059-2.697  |
| Jang (2013) <sup>a</sup> [29]      | Korea                 | 8889<br>(M:5241;<br>F:3648)       | Male            | Cross-sectional study                | HME | Yes | Obesity                      | 40-48h/w | 49-60h/w   | PH | 1.115 | 0.856-1.452  |
|                                    |                       |                                   |                 |                                      |     |     |                              |          | >60h/w     | PH | 1.647 | 1.262-2.150  |
|                                    |                       |                                   | Female          |                                      |     |     |                              |          | 49-60h/w   | PH | 0.878 | 0.650-1.186  |
|                                    |                       |                                   |                 |                                      |     |     |                              |          | >60h/w     | PH | 1.059 | 0.699-1.604  |
|                                    |                       |                                   |                 |                                      |     |     |                              |          | 49-60h/w   | PH | 0.961 | 0.687-1.345  |
|                                    |                       |                                   |                 |                                      |     |     |                              |          | >60h/w     | PH | 0.863 | 0.624-1.194  |
|                                    |                       |                                   |                 |                                      |     |     |                              |          | 49-60h/w   | PH | 1.340 | 0.781-2.299  |
|                                    |                       |                                   |                 |                                      |     |     |                              |          | >60h/w     | PH | 0.916 | 0.363-2.310  |
| Jeong (2013) <sup>a</sup> [30]     | Korea                 | 1117<br>(M:926;<br>F:121)         | Male and female | Case-control study                   | HME | Yes | Cardiovascular heart disease | 40-48h/w | 48.1-52h/w | PH | 1.730 | 1.031-2.903  |
|                                    |                       |                                   |                 |                                      |     |     |                              |          | >52h/w     | PH | 3.460 | 2.380-5.030  |
| Lee (2013) <sup>a</sup> [31]       | Korea                 | 561 (M:417;<br>F:144)             | Male and female | Cross-sectional study                | SR  | No  | Low mood                     | 35-47h/w | 48-52h/w   | MH | 0.820 | 0.530-1.260  |
|                                    |                       |                                   |                 |                                      |     |     |                              |          | 53-60h/w   |    | 1.260 | 0.780-2.050  |
|                                    |                       |                                   |                 |                                      |     |     | Depression                   |          | ≥60h/w     |    | 1.030 | 0.410-2.580  |
|                                    |                       |                                   |                 |                                      |     |     |                              |          | 48-52h/w   | MH | 1.36  | 0.820-2.260  |
|                                    |                       |                                   |                 |                                      |     |     |                              |          | 53-60h/w   |    | 2.94  | 1.540-5.590  |
|                                    |                       |                                   |                 |                                      |     |     |                              |          | ≥60h/w     |    | 4.35  | 2.180-8.67   |
| Ohtsu (2013) <sup>a</sup> [32]     | Japan                 | 662<br>(M:372;<br>F:290)          | Male            | Cross-sectional study                | SR  | No  | Short sleep (<6h/d)          | 7-<9h/d  | ≥9-<11h/d  | RH | 2.760 | 1.569-4.856  |
|                                    |                       |                                   | Female          |                                      |     |     |                              |          | ≥11h/d     | RH | 8.620 | 3.940-18.859 |
|                                    |                       |                                   |                 |                                      |     |     |                              |          | ≥9-<11h/d  | RH | 2.510 | 1.169-5.387  |
| O' Reilly (2013) <sup>a</sup> [33] | North Ireland, the UK | 414949<br>(M:270011;<br>F:144938) | Male            | Prospective Cohort Study (8.7 years) | HME | Yes | All-cause mortality          | 35-40h/w | 41-48h/w   | PH | 0.960 | 0.879-1.049  |
|                                    |                       |                                   |                 |                                      |     |     |                              |          | 49-54h/w   | PH | 1.020 | 0.920-1.130  |
|                                    |                       |                                   | Female          |                                      |     |     |                              |          | ≥55h/w     | PH | 0.970 | 0.880-1.070  |
|                                    |                       |                                   |                 |                                      |     |     |                              |          | 41-48h/w   | PH | 0.980 | 0.797-1.205  |
|                                    |                       |                                   |                 |                                      |     |     |                              |          | 49-54h/w   | PH | 1.170 | 0.871-1.572  |
|                                    |                       |                                   |                 |                                      |     |     |                              |          | ≥55h/w     | PH | 0.860 | 0.631-1.172  |
| Cheng (2014) <sup>a</sup> [34]     | Taiwan, China         | 966                               | Male            | Case-control study                   | HME | No  | Acute myocardial infarction  | 40-48h/w | >48-60h/w  | PH | 1.600 | 1.012-2.530  |
|                                    |                       |                                   |                 |                                      |     |     |                              |          | >60h/w     | PH | 2.400 | 1.470-3.919  |
|                                    |                       |                                   |                 |                                      |     |     |                              |          | >48-60h/w  | PH | 1.600 | 1.209-2.117  |
|                                    |                       |                                   |                 |                                      |     |     |                              |          | >60h/w     | PH | 2.300 | 1.703-3.106  |
| Tayama (2014) <sup>a</sup> [35]    | China and Japan       | 2228<br>(M:1426;<br>F:802)        | Male            | Cross-sectional study                | HME | Yes | Diabetes                     | <45 h/w  | 45-54h/w   | PH | 1.130 | 0.736-1.735  |
|                                    |                       |                                   | Female          |                                      |     |     |                              |          | ≥55h/w     | PH | 2.200 | 1.391-3.479  |
|                                    |                       |                                   |                 |                                      |     |     |                              |          | 45-54h/w   | PH | -     | -            |
|                                    |                       |                                   |                 |                                      |     |     |                              |          | ≥55h/w     | PH | -     | -            |

|                                 |       |                            |                              |                                    |     |     |                        |             |             |                       |                 |                       |
|---------------------------------|-------|----------------------------|------------------------------|------------------------------------|-----|-----|------------------------|-------------|-------------|-----------------------|-----------------|-----------------------|
| Bannai (2015) <sup>a</sup> [36] | Japan | 515 (M:335; F:180)         | Male                         | Cross-sectional study              | SR  | Yes | Sleep problem          | ≤40h/w      | >40-≤50h/w  | RH                    | 1.140           | 0.470-2.768           |
|                                 |       |                            | Female                       |                                    |     |     |                        |             | >50-≤60h/w  | RH                    | 1.200           | 0.547-2.634           |
|                                 |       |                            |                              |                                    |     |     |                        |             | >60h/w      | RH                    | 2.050           | 0.994-4.230           |
|                                 |       |                            |                              |                                    |     |     |                        |             | >40-≤50h/w  | RH                    | 0.640           | 0.169-2.430           |
|                                 |       |                            |                              |                                    |     |     |                        |             | >50-≤60h/w  | RH                    | 0.650           | 0.187-2.262           |
|                                 |       |                            | >60h/w                       |                                    |     |     |                        |             | RH          | 1.260                 | 0.365-4.345     |                       |
| Cho (2015) <sup>a</sup> [37]    | Korea | 1578 (M:1072; F:506)       | Male                         | Prospective cohort study (7 years) | SR  | Yes | Poor self-rated health | 36-40h/w    | 41-52h/w    | NH                    | 0.890           | 0.745-1.063           |
|                                 |       |                            | Female                       |                                    |     |     |                        |             | 52-68h/w    | NH                    | 0.930           | 0.754-1.147           |
|                                 |       |                            |                              |                                    |     |     |                        |             | ≥69h/w      | NH                    | 1.020           | 0.787-1.322           |
|                                 |       |                            |                              |                                    |     |     |                        |             | 41-52h/w    | NH                    | 1.000           | 0.767-1.304           |
|                                 |       |                            |                              |                                    |     |     |                        |             | 52-68h/w    | NH                    | 1.170           | 0.853-1.605           |
|                                 |       |                            | ≥69h/w                       |                                    |     |     |                        |             | NH          | 1.630                 | 1.050-2.530     |                       |
| Hino (2015) [38]                | Japan | 1198 (M:457; F:741)        | Male and female              | Cross-sectional study              | SR  | Yes | Psychological distress | ≤55h/w      | >45-79h/w   | MH                    | 1.260           | 0.800-1.980           |
|                                 |       |                            | >80h/w                       |                                    |     |     |                        |             | MH          | 1.380                 | 0.730-2.600     |                       |
|                                 |       |                            |                              |                                    |     |     |                        |             |             |                       |                 |                       |
| Kim (2015) <sup>a</sup> [39]    | Korea | 34783 (M: 20543; F: 14240) | Male                         | Cross-sectional study              | SR  | Yes | Sleep disturbance      | ≥40- <48h/w | ≥49-≤60h/w  | RH                    | 2.389           | 1.807-3.158           |
|                                 |       |                            | Female                       |                                    |     |     |                        |             | >60h/w      | RH                    | 3.017           | 1.956-4.653           |
|                                 |       |                            |                              |                                    |     |     |                        |             | ≥49-≤60h/w  | RH                    | 1.041           | 0.766-1.415           |
|                                 |       |                            |                              |                                    |     |     |                        |             | >60h/w      | RH                    | 1.418           | 1.003-2.005           |
|                                 |       |                            |                              |                                    |     |     |                        |             | ≥49-≤60h/w  | RH                    | 1.525           | 1.034-2.249           |
|                                 |       |                            |                              |                                    |     |     |                        |             | >60h/w      | RH                    | 0.994           | 0.398-2.484           |
|                                 |       |                            |                              |                                    |     |     |                        |             | ≥49-≤60h/w  | RH                    | 0.826           | 0.540-1.263           |
|                                 |       |                            |                              |                                    |     |     |                        |             | >60h/w      | RH                    | 1.241           | 0.721-2.136           |
|                                 |       |                            |                              |                                    |     |     |                        |             |             |                       |                 |                       |
|                                 |       |                            | Kim (2016) <sup>a</sup> [40] |                                    |     |     |                        |             | South Korea | 6805 (M:4319; F:2486) | Male and female | Cross-sectional study |
| 53-68h/w                        | MH    | 1.000                      |                              | 0.743-1.346                        |     |     |                        |             |             |                       |                 |                       |
| >68h/w                          | MH    | 1.570                      |                              | 1.052-2.344                        |     |     |                        |             |             |                       |                 |                       |
| Yoon (2016) <sup>a</sup> [41]   | Korea | 42234                      | Female                       | Cross-sectional study              | HME | Yes | Obesity                | <40h/w      | 50-54h/w    | PH                    | 1.080           | 0.859-1.358           |
|                                 |       |                            | 55-59h/w                     |                                    |     |     |                        |             | PH          | 1.020                 | 0.724-1.437     |                       |
|                                 |       |                            | ≥60h/w                       |                                    |     |     |                        |             | PH          | 1.280                 | 1.042-1.573     |                       |



|                                 |             |                                |                 |                       |    |     |                              |           |               |    |       |              |
|---------------------------------|-------------|--------------------------------|-----------------|-----------------------|----|-----|------------------------------|-----------|---------------|----|-------|--------------|
|                                 |             |                                | Female          |                       |    |     |                              |           | 50-54h/w      | PH | 0.990 | 0.869-1.128  |
|                                 |             |                                |                 |                       |    |     |                              |           | 55-59h/w      | PH | 1.110 | 0.966-1.275  |
|                                 |             |                                |                 |                       |    |     |                              |           | ≥60h/w        | PH | 1.080 | 0.859-1.358  |
| Lee (2017) <sup>a</sup><br>[42] | South Korea | 1030                           | Male            | Cross-sectional study | SR | Yes | Psychological stress         | 40-44 h/w | 45-49h/w      | MH | 0.940 | 0.520-1.700  |
|                                 |             |                                |                 |                       |    |     |                              |           | 50-54h/w      | MH | 0.990 | 0.533-1.840  |
|                                 |             |                                |                 |                       |    |     |                              |           | 55-59h/w      | MH | 1.330 | 0.666-2.655  |
|                                 |             |                                |                 |                       |    |     |                              |           | ≥60 h/w       | MH | 3.000 | 1.381-6.516  |
| Ma (2017) <sup>a</sup><br>[43]  | China       | 595<br>(M:406;<br>F:189)       | Male and female | Case-control study    | SR | No  | Cardiovascular heart disease | Not given | 35-40h/w      | PH | 0.977 | 0.544-1.754  |
|                                 |             |                                |                 |                       |    |     |                              |           | 41-48h/w      | PH | 1.439 | 0.759-2.729  |
|                                 |             |                                |                 |                       |    |     |                              |           | 49-54h/w      | PH | 1.383 | 0.669-2.858  |
|                                 |             |                                |                 |                       |    |     |                              |           | ≥55h/w        | PH | 2.213 | 1.125-4.354  |
| Nakata (2017) [44]              | Japan       | 2375<br>(M:1739;<br>F:636)     | Male and female | Cross-sectional study | SR | Yes | Depressive symptoms          | 6-8h/d    | >8-10h/d      | MH | 1.120 | 0.893-1.405  |
|                                 |             |                                |                 |                       |    |     |                              |           | >10h/d        | MH | 1.490 | 1.069-2.077  |
| Cho (2018) <sup>a</sup><br>[45] | Korea       | 32867<br>(M:20200;<br>F:12667) | Male and female | Cross-sectional study | SR | Yes | Poor self-rated health       | ≤52h/w    | >52h/w        | NH | 1.300 | 1.220-1.400  |
| Ogawa (2018) <sup>a</sup> [46]  | Japan       | 973 (M:812;<br>F:161)          | Male and female | Cross-sectional study | SR | Yes | Depressive symptoms          | <60h/w    | 60-<br><80h/w | MH | 1.900 | 0.911-3.962  |
|                                 |             |                                |                 |                       |    |     |                              |           | 80-<br>100h/w | MH | 2.830 | 1.361-5.884  |
|                                 |             |                                |                 |                       |    |     |                              |           | ≥100h/w       | MH | 6.960 | 3.048-15.891 |

Note. <sup>a</sup>: The study was included in the moderator analysis for gender

OR = odds ratio; PH = physiological health; MH = mental health; HB = health behaviours; RH = related health; NH = non-specified health; M = male; F = female; CI = confidence interval; N/A = not applicable; h = hours; w = week; d = day; SR = self-report; HME = health or medical examination

## References

1. Sokejima, S.; Kagamimori, S. Working hours as a risk factor for acute myocardial infarction in Japan: Case-control study. *BMJ* **1998**, *317*, 775-780.
2. Nakanishi, N.; Nishina, K.; Yoshida, H.; Matsuo, Y.; Nagano, K.; Nakamura, K.; Suzuki, K.; Tataru, K. Hours of work and the risk of developing impaired fasting glucose or type 2 diabetes mellitus in Japanese male office workers. *Occup. Environ. Med.* **2001**, *58*, 569–574.
3. Nakanishi, N.; Yoshida, H.; Nagano, K.; Kawashimo, H.; Nakamura, K.; Tataru, K. Long working hours and risk for hypertension in Japanese male white collar workers. *J. Epidemiol. Community Health* **2001**, *55*, 316–322.
4. Liu, Y.; Tanaka, H. Overtime work, insufficient sleep, and risk of non-fatal acute myocardial infarction in Japanese men. *Occup. Environ. Med.* **2002**, *59*, 447–451.

5. Akerstedt, T.; Knutsson, A.; Westerholm, P.; Theorell, T.; Alfredsson, L.; Kecklund, G. Sleep disturbances, work stress and work hours: A cross-sectional study. *J. Psychosom. Res.* **2002**, *53*, 741–748.
6. Tarumi, K.; Hagihara, A.; Morimoto, K. A prospective observation of onsets of health defects associated with working hours. *Ind. Health* **2003**, *41*, 101–108.
7. Fukuoka, Y.; Dracup, K.; Froelicher, E.S.; Ohno, M.; Hirayama, H.; Shiina, H.; Kobayashi, F. Do Japanese workers who experience an acute myocardial infarction believe their prolonged working hours are a cause? *Int. J. Cardiol.* **2005**, *100*, 29–35.
8. Uchiyama, S.; Kurasawa, T., Sekizawa, T., Nakatsuka, H. Job strain and risk of cardiovascular events in treated hypertensive Japanese workers: Hypertension follow-up group study. *J. Occup. Health* **2005**, *47*, 102–111.
9. Grosch, J.W.; Caruso, C.C.; Rosa, R.R.; Sauter, S.L. Long hours of work in the US: Associations with demographic and organizational characteristics, psychosocial working conditions, and health. *Am. J. Ind. Med.* **2006**, *49*, 943–952.
10. Sekine, M., Chandola, T., Martikainen, P., Marmot, M., Kagamimori, S. Work and family characteristics as determinants of socioeconomic and sex inequalities in sleep: The Japanese civil servants study. *Sleep* **2006**, *29*, 206–216.
11. Yang, Y.; Schnall, P.L.; Jauregui, M.; Su, T.C.; Baker, D. Work hours and self-reported hypertension among working people in California. *Hypertension* **2006**, *48*, 744–750.
12. Nagashima, S.; Suwazono, Y.; Okubo, Y. Working hours and mental and physical fatigue in Japanese workers. *Occup. Med.* **2007**, *57*, 449–452.
13. Lallukka, T.; Lahelma, E.; Rahkonen, O.; Roos, E.; Laaksonen, E.; Martikainen, P.; Head, J.; Brunner, E.; Mosdol, A.; Marmot, M.; et al. Associations of job strain and working overtime with adverse health behaviors and obesity: Evidence from the Whitehall II Study, Helsinki Health Study, and the Japanese Civil Servants Study. *Soc. Sci. Med.* **2008**, *66*, 1681–1698.
14. Artazcoz, L.; Cortès, I.; Escribà-Agüir, V.; Cascant, L.; Villegas, R. Understanding the relationship of long working hours with health status and health-related behaviours. *J. Epidemiol. Community Health* **2009**, *63*, 521–527.
15. Pimenta, A.M.; Beunza, J.J.; Bes-Rastrollo, M.; Alonso, A.; López, C.N, Velásquez-Meléndez G, Martínez-González M.A. Work hours and incidence of hypertension among Spanish University graduates: The Seguimiento Universidad de Navarra prospective cohort. *J. Hypertens.* **2009**, *27*, 34–40.
16. Virtanen, M.; Ferrie, J.E.; Gimeno, D.; Vahtera, J.; Elovainio, M.; Singh-Manoux, A. Long working hours and sleep disturbances: The Whitehall II prospective cohort study. *Sleep* **2009**, *32*, 737–745.
17. Driesen, K.; Jansen, N.W.; Kant, I.; Mohren, D.C.; van Amelsvoort, L.G. Depressed mood in the working population: Associations with work schedules and working hours. *Chronobiol. Int.* **2010**, *27*, 1062–1079.
18. Holtermann, A.; Mortensen, O.S.; Burr, H.; Søgaard, K.; Gyntelberg, F.; Suadicani, P. Physical demands at work, physical fitness, and 30-year ischaemic heart disease and all-cause mortality in the Copenhagen male study. *Scand. J. Work. Environment. Health* **2010**, *36*, 357–365.
19. Nash, L.M.; Daly, M.G.; Kelly, P.J.; van Ekert, E.H.; Walter, G.; Walton, M.; Willcock, S.M.; Tennant C.C. Factors associated with psychiatric morbidity and hazardous alcohol use in Australian doctors. *Med. J. Aust.* **2010**, *193*, 161–166.
20. Netterstrøm, B.; Kristensen, T.S.; Jensen, G.; Schnor, P. Is the demand-control model still a useful tool to assess work-related psychosocial risk for ischemic heart disease? Results from 14 year follow up in the Copenhagen City heart study. *Int. J. Occup. Med. Environ. Health* **2010**, *23*, 217–524.
21. Virtanen, M.; Ferrie, J.E.; Singh-Manoux, A.; Shipley, M.J.; Vahtera, J., Marmot, M.G.; Kivimäki, M. Overtime work and incident coronary heart disease: The Whitehall II prospective cohort study. *Eur. Heart J.* **2010**, *31*, 1737–1744.

22. Kivimäki, M.; Batty, G.D.; Ferrie, J.E.; Vahtera, J.; Virtanen, M., Marmot, M.G.; Singh-Manoux, A; Shipley, M.J. Using additional information on working hours to predict coronary heart disease: A cohort study. *Ann. Intern. Med.* **2011**, *154*, 457–463.
23. Nakashima, M.; Morikawa, Y.; Sakurai, M.; Nakamura, K.; Miura, K.; Ishizaki, M., Kido, T.; Naruse, Y.; Suwazono, Y.; Nakagawa, H. Association between long working hours and sleep problems in white-collar workers. *J. Sleep Res.* **2011**, *20*, 110–116
24. Virtanen, M.; Ferrie, J.E.; Singh-Manoux, A.; Shipley, M.J.; Stansfeld, S.A.; Marmot, M.G.; Ahola, K.; Vahtera, J.; Kivimäki, M. Long working hours and symptoms of anxiety and depression: A 5-year follow-up of the Whitehall II study. *Psychol. Med.* **2011**, *41*, 2485–2494.
25. Kobayashi, T.; Suzuki, E.; Takao, S.; Doi, H. Long working hours and metabolic syndrome among Japanese men: A cross-sectional study. *BMC Public Health* **2012**, *12*, 395, doi:10.1186/1471-2458-12-395.
26. Schluter, P.J.; Turner, C.; Benefer, C. Long working hours and alcohol risk among Australian and New Zealand nurses and midwives: A cross-sectional study. *Int. J. Nurs. Stud.* **2012**, *49*, 701–709.
27. Virtanen, M.; Stansfeld, S.A.; Fuhrer, R.; Ferrie, J.E.; Kivimäki, M. Overtime work as a predictor of major depressive episode: a 5-year follow-up of the Whitehall II study. *PLoS One.* **2012**, *1*, e30719, doi: 10. 0.1371/journal.pone.0030719.
28. Wirtz, A.; Lombardi, D.A.; Willetts, J.L.; Folkard, S.; Christiani, D.C. Gender differences in the effect of weekly working hours on occupational injury risk in the United States working population. *Scand. J. Work Environ. Health* **2012**, *38*, 349–357.
29. Jang, T.W.; Kim, H.R.; Lee, H.E.; Myong, J.P.; Koo, J.W. Long work hours and obesity in Korean adult workers. *J. Occup. Health* **2013**, *55*, 359–366.
30. Jeong, I.; Rhie, J.; Kim, I.; Ryu, I.; Jung, P.K.; Park, Y.S., Lim, Y.S.; Kim, S.G.; Park, S.G.; Im, H.L.; et al. Working hours and cardiovascular disease in Korean workers: A case-control study. *J. Occup. Health* **2013**, *55*, 385-391.
31. Lee, K.H.; Kim, J.E.; Kim, Y.K.; Kang, D.M.; Yun, M.Y.; Park, S.G.; Song, J.S.; Lee, S.G. Long working hours and emotional well-being in Korean manufacturing industry employees. *Ann. Occup. Environ. Med.* **2013**, *25*, 38, doi:10.1186/2052-4374-25-38.
32. Ohtsu, T.; Kaneita, Y.; Aritake, S.; Mishima, K.; Uchiyama, M.; Akashiba, T., Uchimura, N.; Nakaji, S.; Munezawa, T.; Kokaze, A.; et al. A cross-sectional study of the association between working hours and sleep duration among the Japanese working population. *J. Occup. Health* **2013**, *4*, 307–311.
33. O' Reilly, D.; Rosato, M. Worked to death? A census-based longitudinal study of the relationship between the numbers of hours spent working and mortality risk. *Int. J. Epidemiol.* **2013**, *42*, 1820–1830.
34. Cheng, Y.; Du, C.L.; Hwang, J.J.; Chen, I.S.; Chen, M.F.; Su, T.C. Working hours, sleep duration and the risk of Acute Coronary Heart Disease: A case-control study of middle aged men in Taiwan. *Int. J. Cardiol.* **2014**, *171*, 419–422.
35. Tayama, J.; Li, J.; Munakata, M. Working long hours is associated with higher prevalence of diabetes in urban male Chinese workers: The rosai karoshi study. *Stress Health* **2014**, *32*, 84–87.
36. Bannai, A.; Ukawa, S.; Tamakoshi, A. Long working hours and sleep problems among public junior high school teachers in Japan. *J. Occup. Health* **2015**, *57*, 446–475.
37. Cho, S.S.; Ki, M.; Kim, K.H.; Ju, Y.S.; Paek, D.Y.; Lee, W.Y. Working hours and self-rated health over 7 years: Gender differences in a Korean longitudinal study. *BMC Public Health* **2015**, *15*, 1287.
38. Hino, A.; Inoue, A.; Kawakami, N.; Tsuno, K.; Tomioka, K.; Nakanishi, M., Mafune, K.; Hiro, H. Buffering effects of job resources on the association of overtime work hours with psychological distress in Japanese white-collar workers. *Int. Arch. Occup. Environ. Health* **2015**, *88*, 631–640.

39. Kim, B.H.; Lee, H.E. The association between working hours and sleep disturbances according to occupation and gender. *Chronobiol. Int.* **2015**, *32*, 1109–1114.
40. Kim, W.; Park, E.C.; Lee, T.H.; Kim, T.H. Effect of working hours and precarious employment on depressive symptoms in South Korean employees: A longitudinal study. *Occup. Environ. Med.* **2016**, *73*, 816–822.
41. Yoon, C.G.; Kang, M.Y.; Bae, K.J.; Yoon, J.H. Do working hours and type of work affect obesity in South Korean female workers? Analysis of the Korean community health survey. *J. Women's Health* **2016**, *25*, 2.
42. Lee, K.; Suh, C.; Kim, J.E.; Park, J.O. The impact of long working hours on psychosocial stress response among white-collar workers. *Ind. Health* **2017**, *55*, 46–53.
43. Ma, Y.; Wang, Y.J.; Chen, B.R.; Shi, H.J.; Wang, H.; Khurwolah, M.R.; Li, Y.F.; Xie, Z.Y.; Yang, Y.; Wang, L.S. Study on association of working hours and occupational physical activity with the occurrence of coronary heart disease in a Chinese population. *PLoS One* **2017**, *12*, e0185598.
44. Nakata, A. Long working hours, job satisfaction, and depressive symptoms: A community-based cross-sectional study among Japanese employees in small- and medium-scale businesses *Oncotarget* **2017**, *8*, 53041–53052.
45. Cho, S.S.; Ju, Y.S.; Paek, D.; Kim, H.; Jung-Choi, K. The combined effect of long working hours and low job control on self-rated health: An interaction analysis. *J. Occup. Environ. Med.* **2018**, *60*, 475–480.
46. Ogawa, R.; Seo, E.; Maeno, T.; Ito, M.; Sanuki, M.; Maeno, T. The relationship between long working hours and depression among first-year residents in Japan. *BMC Med. Educ.* **2018**, *18*, 50.
